# Supplementary material
Source: Springer Nature journal article supplement (https://www.springermedizin.de/resource/supplementary/12885_2012_3581_MOESM3_ESM.pdf/9463242)
Supplement: MOESM3 [file 9463242]

**Perioperative CT n=36**  
Neoadj CT alone=12  
Adjuvant CT alone=8, Both=16

**No Perioperative CT n=15**

**Initial resection n=51**

**Disease-free n=18**  
median follow up= 57m  
(range18.7-109.4)  
Perioperative CT n=15  
(neoadj CT alone=3,  
Adj CT alone=5, Both =6)  
No CT n=3

**Relapse n=33**  
Median RFS=29m  
Perioperative CT n=21 (30m)  
No CT n=12 (RFS 21 m)

**Sites of relapse**  
Lung only n=23  
Liver only n=1  
Other sites=9

**Liver resection n=1**

**pelvic recurrence-TME n=1**

**Perioperative CT n=10**  
Neoadj CT n=5  
Adj CT n=1 Both=4

**No Perioperative CT n=5**

**Subsequent Pulmonary Resection n=15**

**Disease-free n=2**  
At 40.2m & 84.4m follow up

**Further Relapse n= 13**  
Median RFS 7.4m

**Sites of relapse**  
Lung only n=9  
Other sites=4

**No Perioperative CT n=2**

**Perioperative CT n=3**  
Neoadj CT n=1  
Adj CT n=1 Both=10

**3<sup>rd</sup> Pulmonary Resection n=5**

**Disease-free n=1**  
At 38.3m follow up

**Further Relapse n=4**  
Lung only n=2, other=2

CT=chemotherapy  
Neoadj CT =neoadjuvant chemotherapy  
Adj CT=Adjuvant chemotherapy  
RFS=Relapse-Free Survival
